# Supplementary material
Source: MDPI journal article supplement (https://www.mdpi.com/2073-4395/14/3/571)
Supplement: s1 [file s1]

**Table S1.** Names, functions, and substrates of soil extracellular enzymes.

| Ecology function | Extracellular enzymes | Substrate                                |
|------------------|-----------------------|------------------------------------------|
| Carbon cycle     | BG                    | 4-MUB- $\beta$ -D-glucoside              |
|                  | CBH                   | 4-MUB- $\beta$ -D-cellobioside           |
| Nitrogen cycle   | NAG                   | 4-MUB-N-acetyl- $\beta$ -D-glucosaminide |
|                  | LAP                   | L-Leucine-7-amino-4-methylcoumarin       |
| Phosphorus cycle | AP                    | 4-MUB-phosphate disodium salt            |
